# Supplementary material for: Prevalence of bacterial genotypes and outcome of bovine clinical mastitis due to Streptococcus dysgalactiae and Streptococcus uberis
Source: PubMed Central journal article supplement (PMC4255449; doi:10.1186/s13028-014-0080-0), 2014-11-27
Supplement: 13028_2014_80_MOESM1_ESM.pdf [file 13028_2014_80_MOESM1_ESM.pdf]

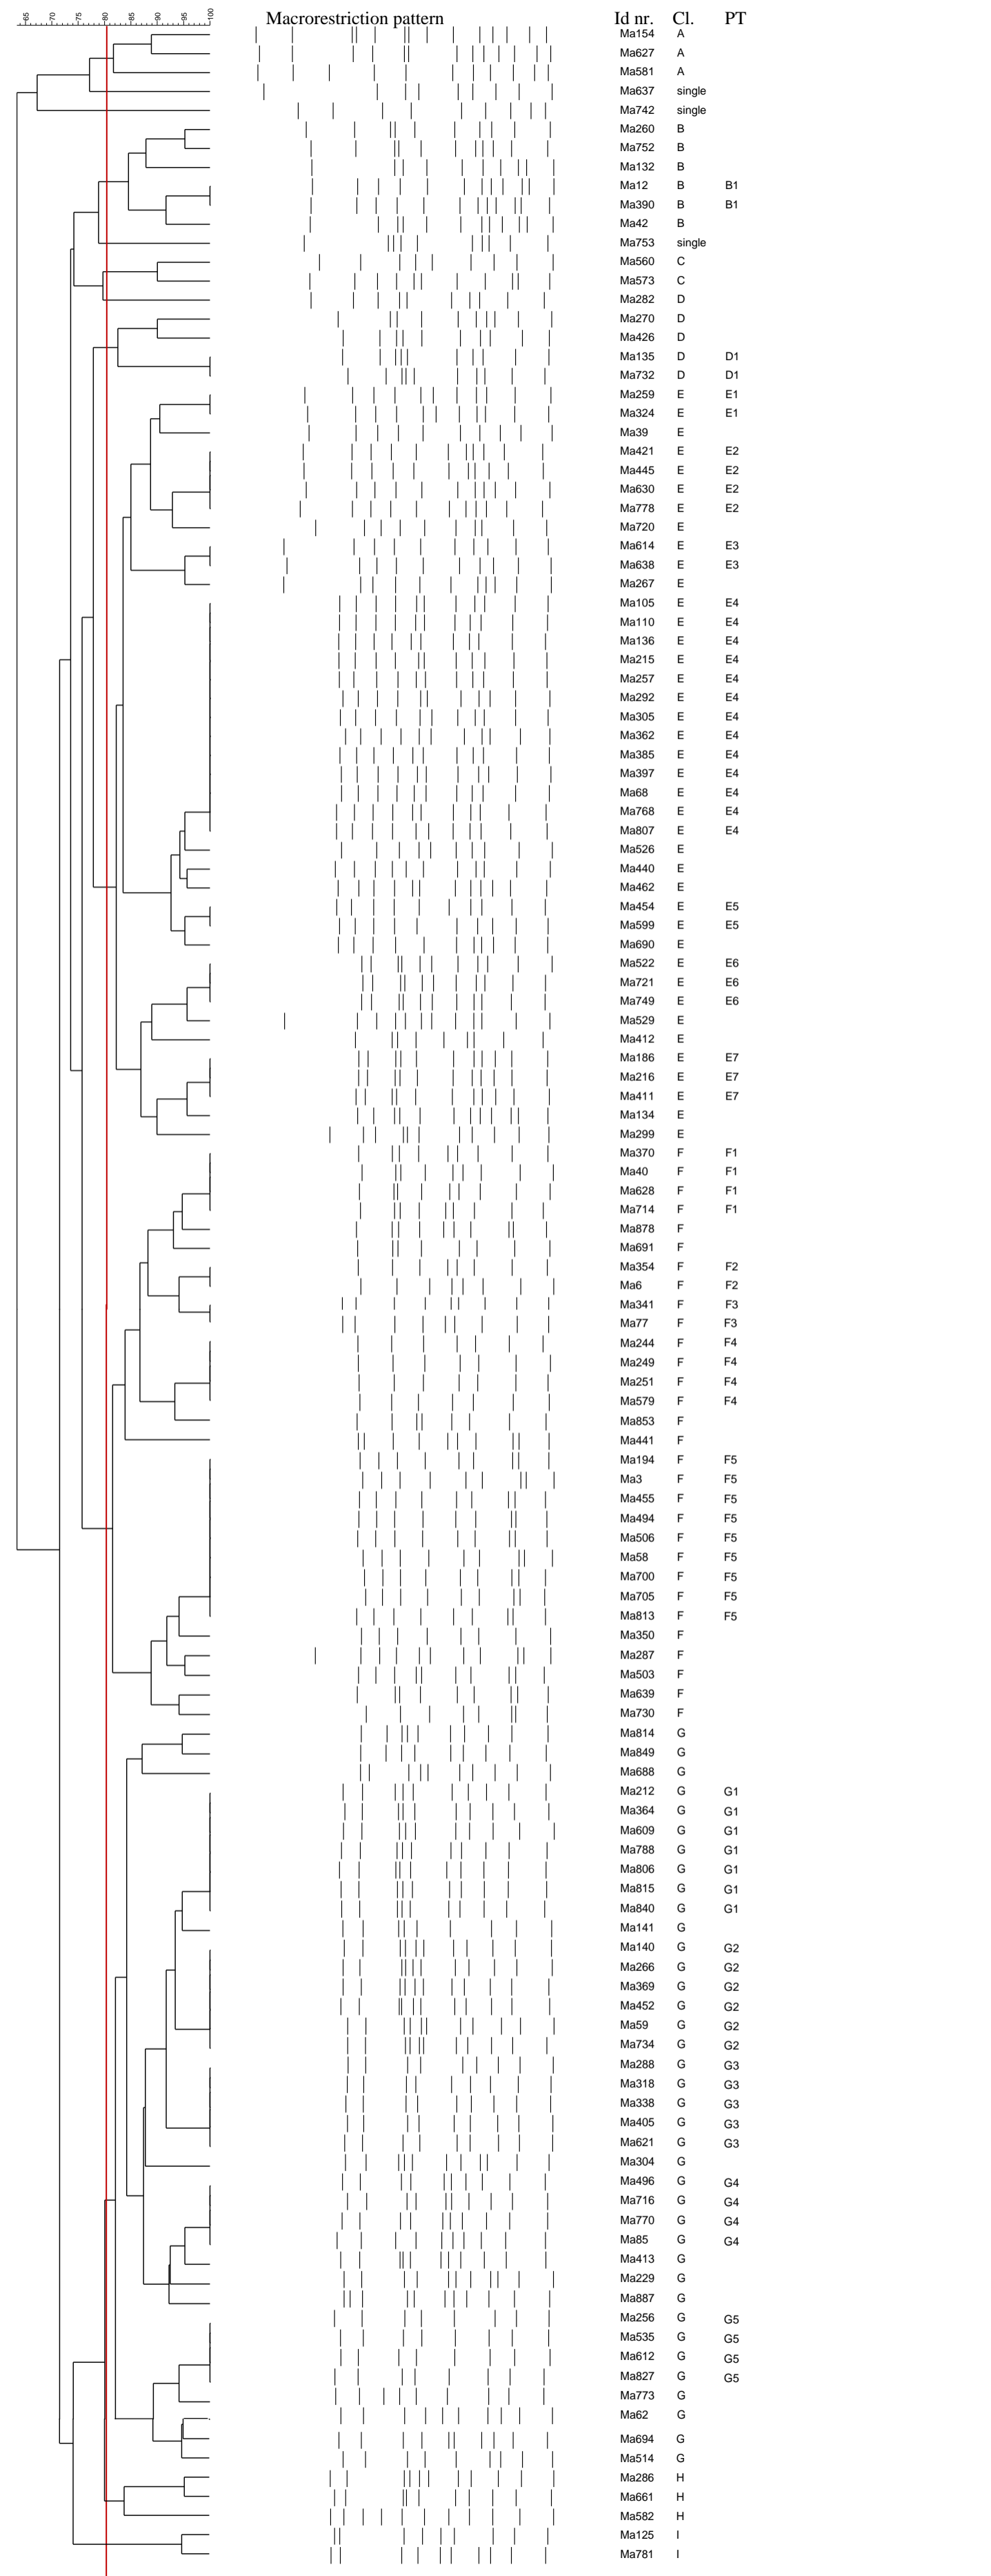

Dendrogram of pulsed-field gel electrophoresis profiles of epidemiologically independent *Streptococcus dysgalactiae* isolates collected from cases of veterinary-treated clinical mastitis in Sweden. Isolate code (IDnr.), cluster name (Cl.) and pulsotype names (PT) are shown, as well as the 80% cutoff line (vertical line) for clusters.
