# Supplementary material for: Prevalence of bacterial genotypes and outcome of bovine clinical mastitis due to Streptococcus dysgalactiae and Streptococcus uberis
Source: PubMed Central journal article supplement (PMC4255449; doi:10.1186/s13028-014-0080-0), 2014-11-27
Supplement: 13028_2014_80_MOESM2_ESM.pdf [file 13028_2014_80_MOESM2_ESM.pdf]

### Macrorestriction pattern

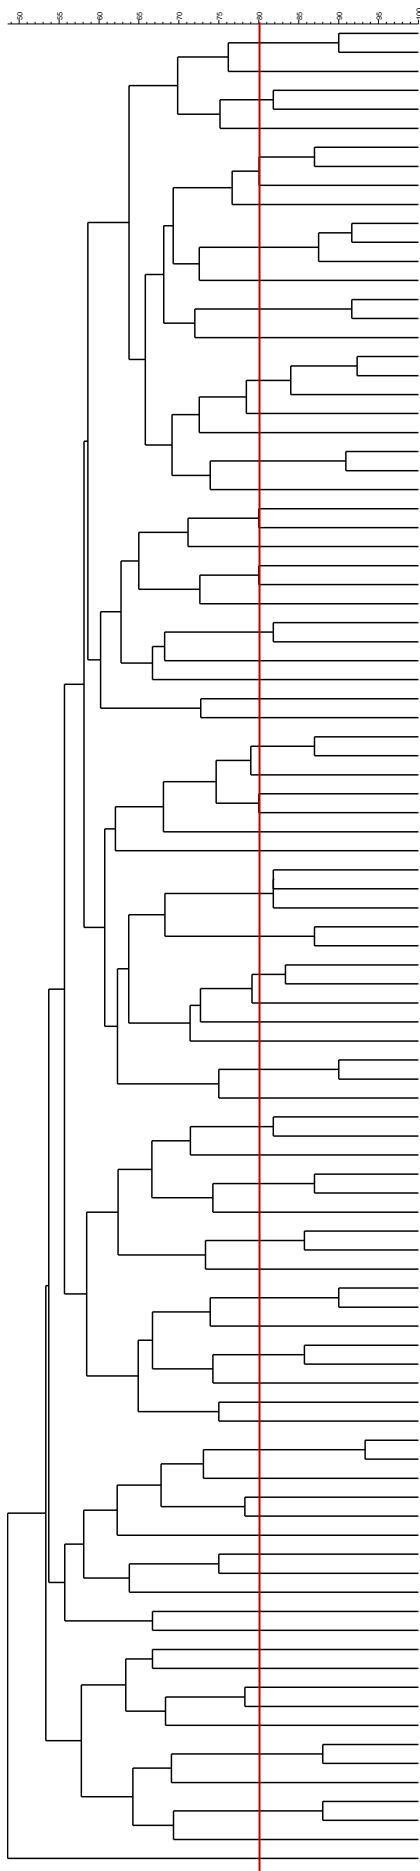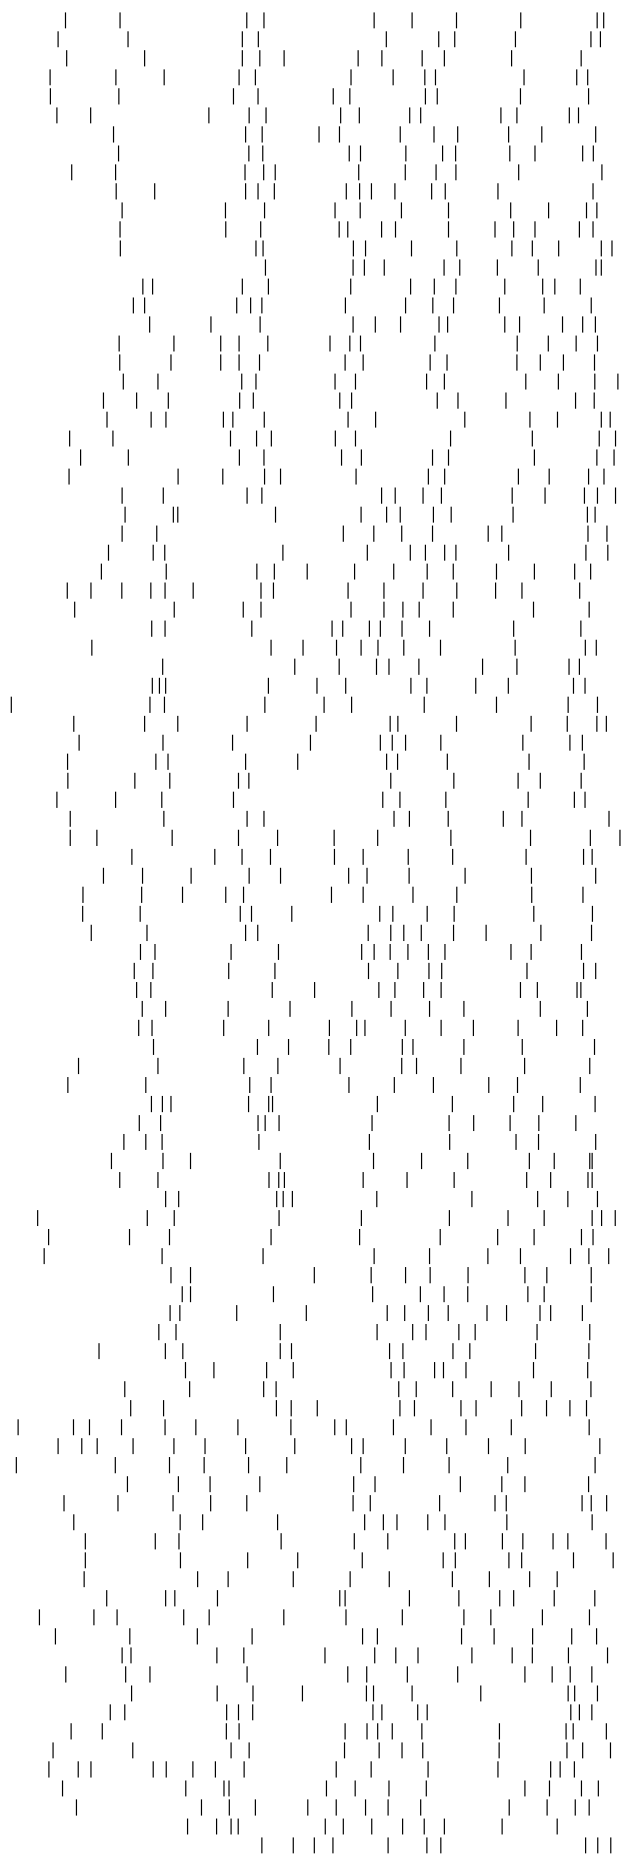

| Isolate ID | Cluster (Cl.) |
|------------|---------------|
| Ma358      | I             |
| Ma795      | I             |
| Ma427      |               |
| Ma185      | II            |
| Ma864      | II            |
| Ma846      |               |
| Ma302      | III           |
| Ma597      | III           |
| Ma378      |               |
| Ma439      |               |
| Ma123      | IV            |
| Ma147      | IV            |
| Ma603      | IV            |
| Ma114      |               |
| Ma174      | V             |
| Ma342      | V             |
| Ma702      |               |
| Ma651      | VI            |
| Ma682      | VI            |
| Ma774      | VI            |
| Ma698      |               |
| Ma453      |               |
| Ma183      | VII           |
| Ma792      | VII           |
| Ma436      |               |
| Ma420      |               |
| Ma475      |               |
| Ma880      |               |
| Ma232      |               |
| Ma566      |               |
| Ma505      |               |
| Ma122      | VIII          |
| Ma488      | VIII          |
| Ma793      |               |
| Ma182      |               |
| Ma47       |               |
| Ma527      |               |
| Ma459      | IX            |
| Ma623      | IX            |
| Ma699      |               |
| Ma368      |               |
| Ma466      |               |
| Ma444      |               |
| Ma92       |               |
| Ma11       | X             |
| Ma380      | X             |
| Ma238      | X             |
| Ma346      | XI            |
| Ma656      | XI            |
| Ma213      | XII           |
| Ma558      | XII           |
| Ma478      |               |
| Ma90       |               |
| Ma30       |               |
| Ma240      | XIII          |
| Ma357      | XIII          |
| Ma195      |               |
| Ma151      | XIV           |
| Ma281      | XIV           |
| Ma117      |               |
| Ma326      | XV            |
| Ma88       | XV            |
| Ma253      |               |
| Ma365      | XVI           |
| Ma548      | XVI           |
| Ma192      |               |
| Ma19       | XVII          |
| Ma332      | XVII          |
| Ma4        |               |
| Ma464      | XVIII         |
| Ma791      | XVIII         |
| Ma395      |               |
| Ma248      |               |
| Ma311      |               |
| Ma626      | XIX           |
| Ma889      | XIX           |
| Ma415      |               |
| Ma363      |               |
| Ma517      |               |
| Ma555      |               |
| Ma416      |               |
| Ma678      |               |
| Ma479      |               |
| Ma351      |               |
| Ma404      |               |
| Ma153      |               |
| Ma56       |               |
| Ma103      |               |
| Ma175      |               |
| Ma885      |               |
| Ma263      | XX            |
| Ma86       | XX            |
| Ma502      |               |
| Ma491      | XXI           |
| Ma863      | XXI           |
| Ma777      |               |
| Ma430      |               |

Dendrogram of pulsed-field gel electrophoresis profiles of epidemiologically independent *Streptococcus uberis* isolates collected from cases of bovine clinical mastitis in Sweden. Isolate code (IDnr.) and cluster (Cl.) names are shown, as well as the 80% cutoff line (vertical line) for clusters.
